# Supplementary material for: The Effect of Silencing Fatty Acid Elongase 4 and 6 Genes on the Proliferation and Migration of Colorectal Cancer Cells
Source: MDPI journal article supplement (doi:10.3390/ijms242417615), 2023-12-18
Supplement: s1 [file s1]

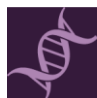

Communication

# The Effect of Silencing Fatty Acid Elongase 4 and 6 Genes on the Proliferation and Migration of Colorectal Cancer Cells

Aleksandra Czumaj <sup>1,\*</sup>, Jarosław Kobiela <sup>2,3</sup>, Adriana Mika <sup>1</sup>, Emmanouil Pappou <sup>4</sup> and Tomasz Śledziński <sup>1</sup>

<sup>1</sup> Department of Pharmaceutical Biochemistry, Faculty of Pharmacy, Medical University of Gdansk, 80-211 Gdansk, Poland; adriana.mika@gumed.edu.pl (A.M.); tomasz.sledzinski@gumed.edu.pl (T.Ś.)

<sup>2</sup> Department of General, Endocrine and Transplant Surgery, Faculty of Medicine, Medical University of Gdansk, 80-211 Gdansk, Poland; jaroslaw.kobiela@gumed.edu.pl

<sup>3</sup> Department of Surgical Oncology, Faculty of Medicine, Medical University of Gdansk, 80-211 Gdansk, Poland

<sup>4</sup> Department of Surgery, Memorial Sloan Kettering Cancer Center, New York, NY 10065, USA; pappoue@mskcc.org

\* Correspondence: aczumaj@gumed.edu.pl

**Citation:** Czumaj, A.; Kobiela, J.; Mika, A.; Pappou, E.; Śledziński, T. The Effect of Silencing Fatty Acid Elongase 4 and 6 Genes on the Proliferation and Migration of Colorectal Cancer Cells. *Int. J. Mol. Sci.* **2023**, *24*, x. <https://doi.org/10.3390/xxxxx>

Academic Editor: Rafael Coveñas Rodríguez

Received: 26 November 2023

Revised: 14 December 2023

Accepted: 15 December 2023

Published: 18 December 2023

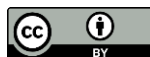

**Copyright:** © 2023 by the authors. Submitted for possible open access publication under the terms and conditions of the Creative Commons Attribution (CC BY) license (<https://creativecommons.org/licenses/by/4.0/>).

**Table S1.** Relative expression level of selected fatty acid elongase in control conditions (basic culture medium), in the presence of positive siRNA control (siRNA GAPDH), negative siRNA control (siRNA(-)) and lipofectamine. Data presented as mean  $\pm$  SD. \*  $p < 0.05$  compared to control condition (base medium).

|                    | ELOVL1          | ELOVL2          | ELOVL3          | ELOVL4          | ELOVL5          | ELOVL6          |
|--------------------|-----------------|-----------------|-----------------|-----------------|-----------------|-----------------|
| <b>CCD-841-CoN</b> |                 |                 |                 |                 |                 |                 |
| Control            | 1.01 $\pm$ 0.09 | 1.03 $\pm$ 0.15 | 1.13 $\pm$ 0.05 | 1.02 $\pm$ 0.12 | 1.05 $\pm$ 0.19 | 1.02 $\pm$ 0.11 |
| siRNA(-)           | 1.00 $\pm$ 0.04 | 1.15 $\pm$ 0.18 | 1.06 $\pm$ 0.15 | 1.22 $\pm$ 0.13 | 0.99 $\pm$ 0.11 | 0.92 $\pm$ 0.05 |
| siRNA GAPDH        | 0.97 $\pm$ 0.13 | 1.00 $\pm$ 0.19 | 1.05 $\pm$ 0.05 | 1.08 $\pm$ 0.14 | 1.08 $\pm$ 0.07 | 1.10 $\pm$ 0.11 |
| Lipofectamine      | 1.04 $\pm$ 0.09 | 1.07 $\pm$ 0.17 | 1.06 $\pm$ 0.13 | 1.03 $\pm$ 0.05 | 0.99 $\pm$ 0.10 | 0.97 $\pm$ 0.08 |
| <b>HT-29</b>       |                 |                 |                 |                 |                 |                 |
| Control            | 1.01 $\pm$ 0.10 | 1.02 $\pm$ 0.06 | 1.06 $\pm$ 0.16 | 1.11 $\pm$ 0.21 | 1.14 $\pm$ 0.17 | 1.04 $\pm$ 0.15 |
| siRNA(-)           | 1.04 $\pm$ 0.27 | 1.08 $\pm$ 0.05 | 1.23 $\pm$ 0.03 | 0.94 $\pm$ 0.05 | 1.05 $\pm$ 0.18 | 1.03 $\pm$ 0.17 |
| siRNA GAPDH        | 1.13 $\pm$ 0.05 | 1.18 $\pm$ 0.11 | 1.19 $\pm$ 0.07 | 1.09 $\pm$ 0.15 | 0.95 $\pm$ 0.10 | 1.15 $\pm$ 0.24 |
| Lipofectamine      | 1.16 $\pm$ 0.22 | 0.96 $\pm$ 0.08 | 1.04 $\pm$ 0.09 | 1.25 $\pm$ 0.11 | 1.01 $\pm$ 0.15 | 0.97 $\pm$ 0.11 |
| <b>WiDr</b>        |                 |                 |                 |                 |                 |                 |
| Control            | 1.01 $\pm$ 0.04 | 1.02 $\pm$ 0.03 | 1.01 $\pm$ 0.02 | 1.01 $\pm$ 0.08 | 1.00 $\pm$ 0.04 | 1.00 $\pm$ 0.10 |
| siRNA(-)           | 1.12 $\pm$ 0.12 | 0.99 $\pm$ 0.22 | 0.95 $\pm$ 0.11 | 1.10 $\pm$ 0.12 | 0.98 $\pm$ 0.06 | 1.16 $\pm$ 0.06 |
| siRNA GAPDH        | 1.13 $\pm$ 0.03 | 1.14 $\pm$ 0.06 | 1.06 $\pm$ 0.07 | 1.13 $\pm$ 0.06 | 1.15 $\pm$ 0.12 | 1.11 $\pm$ 0.06 |
| Lipofectamine      | 0.99 $\pm$ 0.01 | 1.12 $\pm$ 0.17 | 1.20 $\pm$ 0.14 | 1.17 $\pm$ 0.11 | 1.04 $\pm$ 0.14 | 0.98 $\pm$ 0.03 |

**Table S2.** Cell viability (%) after 72h incubations with lipofectamine, negative control, and positive control. Data presented as mean  $\pm$  SD. \*  $p < 0.05$  compared to control condition (base medium).

| Culture conditions | Cell line type     |                    |                    |
|--------------------|--------------------|--------------------|--------------------|
|                    | CCD-841-CoN        | HT-29              | WiDr               |
| Control            | 100 $\pm$ 4.58     | 100 $\pm$ 8.87     | 100 $\pm$ 8.25     |
| Lipofectamine      | 98.69 $\pm$ 7.45   | 95.05 $\pm$ 8.86   | 99.15 $\pm$ 4.45   |
| siRNA(-)           | 98.46 $\pm$ 7.84   | 92.14 $\pm$ 1.31   | 99.75 $\pm$ 2.95   |
| siRNA GAPDH        | 42.20 $\pm$ 7.82 * | 27.25 $\pm$ 7.11 * | 23.54 $\pm$ 3.64 * |

**Table S3.** The migration rate [%] of CCD-841-CoN, HT-29, and WiDr at 0h, 24h, 48h and 72h incubation with negative control (siRNA(-)) or lipofectamine. \*  $p < 0.05$  compared to control condition (base medium).

|                    | 0h   | 24h              | 48h              | 72h               |
|--------------------|------|------------------|------------------|-------------------|
| <b>CCD-841-CoN</b> |      |                  |                  |                   |
| Control            | 0.00 | 40.00 $\pm$ 2.95 | 55.5 $\pm$ 1.52  | 100.00 $\pm$ 4.36 |
| siRNA(-)           | 0.00 | 32.8 $\pm$ 4.37  | 63.08 $\pm$ 2.73 | 97.62 $\pm$ 2.55  |
| Lipofectamine      | 0.00 | 36.7 $\pm$ 4.74  | 66.9 $\pm$ 4.93  | 99.62 $\pm$ 1.52  |
| <b>HT-29</b>       |      |                  |                  |                   |
| Control            | 0.00 | 40.02 $\pm$ 2.36 | 63.00 $\pm$ 4.76 | 100.00 $\pm$ 3.65 |
| siRNA(-)           | 0.00 | 44.3 $\pm$ 7.81  | 66.1 $\pm$ 2.91  | 97.4 $\pm$ 5.58   |
| Lipofectamine      | 0.00 | 46.84 $\pm$ 2.45 | 62.62 $\pm$ 4.84 | 96.39 $\pm$ 4.32  |
| <b>WiDr</b>        |      |                  |                  |                   |
| Control            | 0.00 | 33.8 $\pm$ 1.69  | 75.6 $\pm$ 4.42  | 100.00 $\pm$ 3.66 |
| siRNA(-)           | 0.00 | 35.6 $\pm$ 2.26  | 76.3 $\pm$ 3.84  | 97.26 $\pm$ 4.51  |
| Lipofectamine      | 0.00 | 30.40 $\pm$ 2.25 | 75.50 $\pm$ 2.51 | 92.36 $\pm$ 5.58  |
